# Supplementary material for: Flavor Quality Analysis of Ten Actinidia arguta Fruits Based on High-Performance Liquid Chromatography and Headspace Gas Chromatography–Ion Mobility Spectrometry
Source: MDPI journal article supplement (doi:10.3390/molecules28227559), 2023-11-13
Supplement: s1 [file s1]

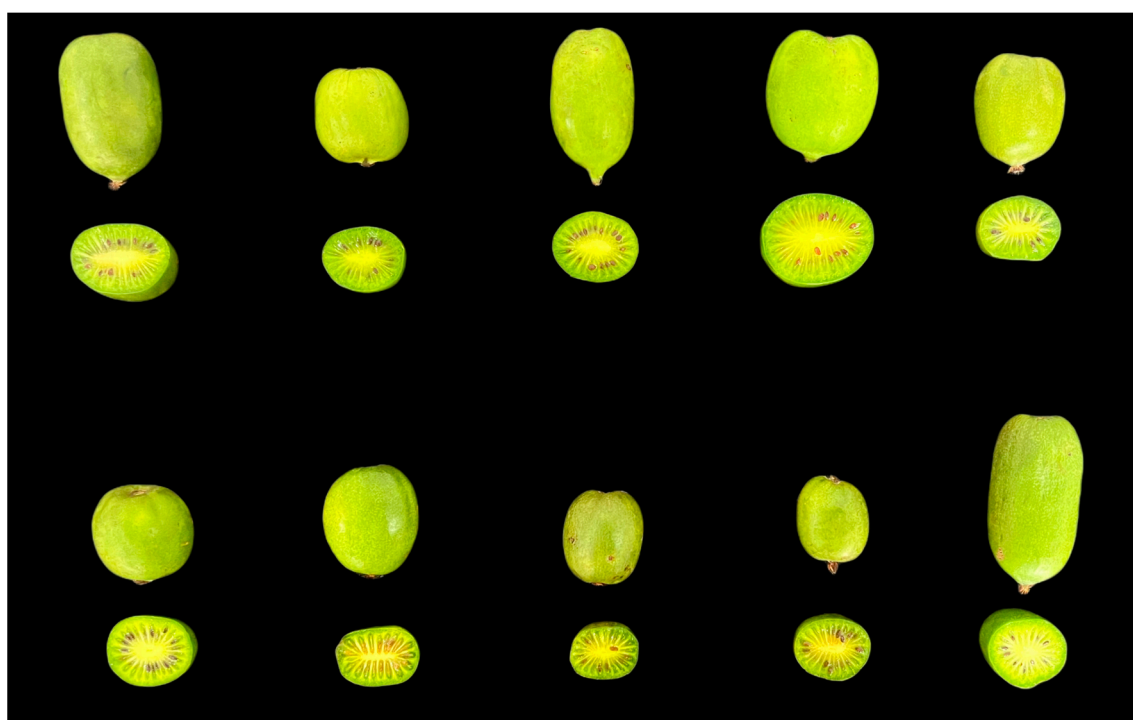

**Figure S1.** The pictures of ten *A. arguta* varieties used in this study. From left to right, the first column is 'Kuily', 'Fenglv', 'Jialv', 'Wanlv', and 'Xinlv'; the second column is 'Pinglv', 'Lvbaol', 'Cuiyu', 'Tianxinbao', and 'Longcheng No.2'.

**Table S1.** GC-IMS integration parameters of volatile compounds detected in *A. arguta* fruits.

| Count | Compounds                  | CAS#      | Formula | MW    | RI     | Rt [sec] | Dt [a.u.] |
|-------|----------------------------|-----------|---------|-------|--------|----------|-----------|
| 1     | (E)-2-Heptenal D           | C18829555 | C7H12O  | 112.2 | 1332.4 | 707.573  | 1.66732   |
| 2     | (E)-2-Heptenal M           | C18829555 | C7H12O  | 112.2 | 1331.8 | 706.641  | 1.25852   |
| 3     | (E)-2-Hexenal D            | C6728263  | C6H10O  | 98.1  | 1228.8 | 538.695  | 1.52704   |
| 4     | (E)-2-Hexenal M            | C6728263  | C6H10O  | 98.1  | 1228   | 537.43   | 1.18512   |
| 5     | (E)-2-Octenal D            | C2548870  | C8H14O  | 126.2 | 1428.1 | 857.246  | 1.81976   |
| 6     | (E)-2-Octenal M            | C2548870  | C8H14O  | 126.2 | 1429.9 | 860.273  | 1.35715   |
| 7     | (E)-2-Pentenal D           | C1576870  | C5H8O   | 84.1  | 1152.3 | 429.912  | 1.36561   |
| 8     | (E)-2-Pentenal M           | C1576870  | C5H8O   | 84.1  | 1155.2 | 433.58   | 1.11013   |
| 9     | (Z)-4-Heptenal D           | C6728310  | C7H12O  | 112.2 | 1217.6 | 521.002  | 1.61223   |
| 10    | (Z)-4-Heptenal M           | C6728310  | C7H12O  | 112.2 | 1210.2 | 509.714  | 1.1513    |
| 11    | 1-Hexanal D                | C66251    | C6H12O  | 100.2 | 1095.1 | 364.304  | 1.56742   |
| 12    | Aldehydes 1-Hexanal M      | C66251    | C6H12O  | 100.2 | 1095.1 | 364.304  | 1.26313   |
| 13    | 1-Nonanal                  | C124196   | C9H18O  | 142.2 | 1400.5 | 811.114  | 1.47214   |
| 14    | 3-Methyl butanal           | C590863   | C5H10O  | 86.1  | 936.1  | 262.201  | 1.40852   |
| 15    | Butanal D                  | C123728   | C4H8O   | 72.1  | 855.4  | 228.299  | 1.28537   |
| 16    | Butanal M                  | C123728   | C4H8O   | 72.1  | 865.6  | 232.302  | 1.09113   |
| 17    | Diethyl acetal             | C105577   | C6H14O2 | 118.2 | 861.6  | 230.741  | 0.96562   |
| 18    | Heptanal D                 | C111717   | C7H14O  | 114.2 | 1197.9 | 491.341  | 1.69632   |
| 19    | Heptanal M                 | C111717   | C7H14O  | 114.2 | 1202.2 | 497.545  | 1.33061   |
| 20    | Benzaldehyde               | C100527   | C7H6O   | 106.1 | 1531   | 1053.665 | 1.15214   |
| 21    | Valeraldehyde              | C123386   | C3H6O   | 58.1  | 857.2  | 228.982  | 1.05585   |
| 22    | Valeraldehyde D            | C110623   | C5H10O  | 86.1  | 1009.8 | 299.861  | 1.42345   |
| 23    | Valeraldehyde M            | C110623   | C5H10O  | 86.1  | 1009   | 299.303  | 1.18328   |
| 24    | (Z)-2-Penten-1-ol          | C1576950  | C5H10O  | 86.1  | 1341.2 | 720.076  | 0.94261   |
| 25    | Alcohols Isoamyl alcohol D | C123513   | C5H12O  | 88.1  | 1215.2 | 517.283  | 1.49058   |
| 26    | Isoamyl alcohol M          | C123513   | C5H12O  | 88.1  | 1215.8 | 518.215  | 1.24622   |
| 27    | 1-Hexanol D                | C111273   | C6H14O  | 102.2 | 1367.6 | 759.214  | 1.64083   |

|    |           |                         |           |          |       |        |          |         |
|----|-----------|-------------------------|-----------|----------|-------|--------|----------|---------|
| 28 |           | 1-Hexanol M             | C111273   | C6H14O   | 102.2 | 1366   | 756.824  | 1.32789 |
| 29 |           | 1-Hydroxy-2-propanone   | C116096   | C3H6O2   | 74.1  | 1265.4 | 600.856  | 1.04385 |
| 30 |           | 1-Octen-3-ol            | C3391864  | C8H16O   | 128.2 | 1475.8 | 943.203  | 1.16364 |
| 31 |           | 1-Pentanol              | C71410    | C5H12O   | 88.1  | 1262.4 | 595.534  | 1.257   |
| 32 |           | 1-Penten-3-ol           | C616251   | C5H10O   | 86.1  | 1167.3 | 449.188  | 0.94193 |
| 33 |           | 1-Propanol              | C71238    | C3H8O    | 60.1  | 1058   | 334.721  | 1.11065 |
| 34 |           | 3-Methyl-2-butanol      | C598754   | C5H12O   | 88.1  | 1054.6 | 332.154  | 1.44161 |
| 35 |           | 1-Butanol               | C71363    | C4H10O   | 74.1  | 1156.4 | 435.103  | 1.18347 |
| 36 |           | 2-Heptanol              | C543497   | C7H16O   | 116.2 | 1300.4 | 663.476  | 1.72087 |
| 37 |           | Ethanol D               | C64175    | C2H6O    | 46.1  | 948.1  | 267.663  | 1.1318  |
| 38 |           | Ethanol M               | C64175    | C2H6O    | 46.1  | 956    | 271.286  | 1.04416 |
| 39 |           | Isobutanol D            | C78831    | C4H10O   | 74.1  | 1108.3 | 378.135  | 1.36557 |
| 40 |           | Isobutanol M            | C78831    | C4H10O   | 74.1  | 1111.3 | 381.492  | 1.17065 |
| 41 |           | 1-Penten-3-one D        | C1629589  | C5H8O    | 84.1  | 1051   | 329.461  | 1.31154 |
| 42 |           | 1-Penten-3-one M        | C1629589  | C5H8O    | 84.1  | 1051.8 | 330.035  | 1.07599 |
| 43 | Ketones   | Acetoin D               | C513860   | C4H8O2   | 88.1  | 1292.6 | 651.606  | 1.33997 |
| 44 |           | Acetoin M               | C513860   | C4H8O2   | 88.1  | 1293   | 652.538  | 1.05873 |
| 45 |           | 3-Octanone              | C106683   | C8H16O   | 128.2 | 1264   | 598.436  | 1.30462 |
| 46 |           | Acetone                 | C67641    | C3H6O    | 58.1  | 846.9  | 224.958  | 1.12006 |
| 47 | Acids     | Pentan-2-one            | C107879   | C5H10O   | 86.1  | 1009.6 | 299.71   | 1.36726 |
| 48 |           | Acetic acid D           | C64197    | C2H4O2   | 60.1  | 1496.2 | 982.63   | 1.15499 |
| 49 |           | Acetic acid M           | C64197    | C2H4O2   | 60.1  | 1499.8 | 989.798  | 1.0478  |
| 50 |           | Ethyl acetate           | C141786   | C4H8O2   | 88.1  | 897.9  | 245.568  | 1.34375 |
| 51 | Esters    | Propyl acetate          | C109604   | C5H10O2  | 102.1 | 977.2  | 281.343  | 1.48148 |
| 52 |           | Methyl benzoate         | C93583    | C8H8O2   | 136.1 | 1661.5 | 1368.998 | 1.20809 |
| 53 |           | Ethyl butyrate D        | C105544   | C6H12O2  | 116.2 | 1044   | 324.193  | 1.55974 |
| 54 |           | Ethyl butyrate M        | C105544   | C6H12O2  | 116.2 | 1055.2 | 332.588  | 1.21395 |
| 55 |           | Butyl isovalerate D     | C109193   | C9H18O2  | 158.2 | 1296   | 657.749  | 1.89962 |
| 56 |           | Butyl isovalerate M     | C109193   | C9H18O2  | 158.2 | 1295.2 | 656.625  | 1.39042 |
| 57 |           | Butyl acetate D         | C123864   | C6H12O2  | 116.2 | 1087.8 | 358.258  | 1.61654 |
| 58 |           | Butyl acetate M         | C123864   | C6H12O2  | 116.2 | 1055.4 | 332.788  | 1.23645 |
| 59 |           | Ethyl formate D         | C109944   | C3H6O2   | 74.1  | 853.4  | 227.494  | 1.21473 |
| 60 |           | Ethyl formate M         | C109944   | C3H6O2   | 74.1  | 849.8  | 226.113  | 1.07293 |
| 61 |           | Geranyl formate         | C105862   | C11H18O2 | 182.3 | 1607.2 | 1227.62  | 1.22408 |
| 62 |           | Hexyl acetate           | C142927   | C8H16O2  | 144.2 | 1241.5 | 559.45   | 1.38689 |
| 63 |           | Hexyl propanoate        | C2445763  | C9H18O2  | 158.2 | 1302.4 | 666.173  | 1.42829 |
| 64 | Terpenes  | Isopentyl acetate D     | C123922   | C7H14O2  | 130.2 | 1154.6 | 432.847  | 1.74622 |
| 65 |           | Isopentyl acetate M     | C123922   | C7H14O2  | 130.2 | 1153.5 | 431.446  | 1.30574 |
| 66 |           | Isobutyl acetate        | C110190   | C6H12O2  | 116.2 | 1039.7 | 321.07   | 1.61897 |
| 67 |           | Methyl isobutyrate      | C547637   | C5H10O2  | 102.1 | 838.7  | 221.818  | 1.1481  |
| 68 |           | Methyl acetate          | C79209    | C3H6O2   | 74.1  | 854.2  | 227.809  | 1.19268 |
| 69 |           | Methyl butanoate        | C623427   | C5H10O2  | 102.1 | 1039.4 | 320.805  | 1.14635 |
| 70 |           | Pentyl acetate D        | C628637   | C7H14O2  | 130.2 | 1194.2 | 485.934  | 1.76536 |
| 71 |           | Pentyl acetate M        | C628637   | C7H14O2  | 130.2 | 1195   | 487.079  | 1.3132  |
| 72 |           | Ethyl propionate        | C105373   | C5H10O2  | 102.1 | 974.6  | 280.122  | 1.45551 |
| 73 |           | Propyl propionate       | C106365   | C6H12O2  | 116.2 | 1056   | 333.196  | 1.587   |
| 74 |           | $\alpha$ -Phellandrene  | C99832    | C10H16   | 136.2 | 1217.3 | 520.491  | 1.6603  |
| 75 |           | $\alpha$ -Pinene        | C80568    | C10H16   | 136.2 | 1030.8 | 314.597  | 1.21616 |
| 76 |           | $\beta$ -Pinene         | C127913   | C10H16   | 136.2 | 1179.1 | 464.874  | 1.21947 |
| 77 |           | Myrcene                 | C123353   | C10H16   | 136.2 | 1126.7 | 398.949  | 1.21743 |
| 78 |           | Terpinolene             | C586629   | C10H16   | 136.2 | 1293.8 | 653.954  | 1.21952 |
| 79 | Pyrazines | 2,3,5-Trimethylpyrazine | C14667551 | C7H10N2  | 122.2 | 1445.4 | 887.482  | 1.17206 |

|    |          |                   |         |       |      |        |         |         |
|----|----------|-------------------|---------|-------|------|--------|---------|---------|
| 80 | Furans   | 2,5-Dimethylfuran | C625865 | C6H8O | 96.1 | 894.2  | 243.994 | 1.03084 |
| 81 | Benzenes | Toluene           | C108883 | C7H8  | 92.1 | 1057.2 | 334.151 | 1.02124 |

MW: molecular weight; RI: retention index; Rt: retention time; Dt: drift time; D: Dimer; M: Monomer

**Table S2.** Composition of volatile compounds in ten *A. arguta* fruits

| Category  | No. | Compounds        | Aroma descriptors <sup>a</sup>                           | Volatile compounds Content of <i>A. arguta</i> fruit (μg/kg) |                             |                             |                            |                             |                             |                            |                            |                                        |                            |
|-----------|-----|------------------|----------------------------------------------------------|--------------------------------------------------------------|-----------------------------|-----------------------------|----------------------------|-----------------------------|-----------------------------|----------------------------|----------------------------|----------------------------------------|----------------------------|
|           |     |                  |                                                          | ‘Kuivl’                                                      | ‘Fenglv’                    | ‘Jialv’                     | ‘Wanlv’                    | ‘Xinlv’                     | ‘Pinglv’                    | ‘Lvobao’                   | ‘Cuiyu’                    | ‘Tianxinbao’                           | ‘Longcheng No2’            |
| Aldehydes | 1   | (E)-2-Heptenal D | Almond, Fat, Fruit                                       | 8.25±0.79 <sup>cde</sup>                                     | 18.76±1.31 <sup>a</sup>     | 10.04±1.12 <sup>bcd</sup>   | 8.08±0.52 <sup>cde</sup>   | 10.59±0.3 <sup>bc</sup>     | 11.83±0.8 <sup>b</sup>      | 6.66±0.32 <sup>de</sup>    | 5±0.35 <sup>e</sup>        | 15.79±3.09 <sup>a</sup>                | 7.42±0.74 <sup>cde</sup>   |
|           | 2   | (E)-2-Heptenal M | Almond, Fat, Fruit                                       | 76.82±13.23 <sup>c</sup>                                     | 102.94±3.3 <sup>ab</sup>    | 92.07±1.55 <sup>b</sup>     | 96.06±0.68 <sup>ab</sup>   | 97.95±2.56 <sup>ab</sup>    | 55.42± 3.3 <sup>d</sup>     | 37.03±1.53 <sup>e</sup>    | 39.71± 0.84 <sup>e</sup>   | 106.84±4.22 <sup>a</sup>               | 71.16±2.97 <sup>c</sup>    |
|           | 3   | (E)-2-Hexenal D  | Apple                                                    | 4201.45±200.38 <sup>b</sup>                                  | 5184.5±72.13 <sup>a</sup>   | 4378.17±153.11 <sup>b</sup> | 3415.07±87.03 <sup>c</sup> | 4499.6±44.58 <sup>b</sup>   | 3770.63±90.74 <sup>c</sup>  | 1224.19±42.5 <sup>e</sup>  | 1127.91±12.55 <sup>e</sup> | 2584.37±140.94 <sup>d</sup>            | 2562.7±33.49 <sup>d</sup>  |
|           | 4   | (E)-2-Hexenal M  | Apple                                                    | 2736.77±122.44 <sup>b</sup>                                  | 2887.35±28.47 <sup>ab</sup> | 2929.11±41.4 <sup>a</sup>   | 2548.6±30.06 <sup>c</sup>  | 2772.73±18.82 <sup>ab</sup> | 2715.64±19.98 <sup>bc</sup> | 1007.46±71.16 <sup>f</sup> | 1108.74±11.34 <sup>f</sup> | 1661.77±50.7 <sup>e</sup>              | 1931.08±27.97 <sup>d</sup> |
|           | 5   | (E)-2-Octenal D  | Dandelion, Fat, Fruit, Grass, Green, Spice               | 17.71±1.13 <sup>d</sup>                                      | 18.04±1.7 <sup>d</sup>      | 15.51±0.92 <sup>d</sup>     | 16.09±0.85 <sup>d</sup>    | 16.54±0.62 <sup>d</sup>     | 47.28±5.47 <sup>b</sup>     | 36.02±1.73 <sup>c</sup>    | 40.61±0.53 <sup>bc</sup>   | 43.39±4.92 <sup>b</sup>                | 61.75±2.76 <sup>a</sup>    |
|           | 6   | (E)-2-Octenal M  | Dandelion, Fat, Fruit, Grass, Green, Spice               | 17.1±1.13 <sup>d</sup>                                       | 19.37±2.25 <sup>d</sup>     | 13.04±1.08 <sup>d</sup>     | 14.5±0.8 <sup>d</sup>      | 25.75±3.61 <sup>d</sup>     | 84.36±8.54 <sup>b</sup>     | 68.18±6.64 <sup>c</sup>    | 77.2±3.52 <sup>bc</sup>    | 83.99±8.71 <sup>b</sup>                | 111.99±4.37 <sup>a</sup>   |
|           | 7   | (E)-2-Pentenal D | Fruit, Pungent                                           | 166.59±7.57 <sup>de</sup>                                    | 431.85±12.57 <sup>a</sup>   | 268.46±18.87 <sup>b</sup>   | 199.21±6.01 <sup>c</sup>   | 277.62±22.83 <sup>b</sup>   | 149.15±9.62 <sup>e</sup>    | 38.58±4.13 <sup>g</sup>    | 52.06±3.36 <sup>g</sup>    | 192.95±15.23 <sup>c</sup> <sub>d</sub> | 114.99±5.2 <sup>f</sup>    |
|           | 8   | (E)-2-Pentenal M | Fruit, Pungent                                           | 141.1±16.74 <sup>cd</sup>                                    | 177.12±1.99 <sup>a</sup>    | 175.32±2.04 <sup>a</sup>    | 133.36±0.47 <sup>cd</sup>  | 150.64±2.78 <sup>bc</sup>   | 162.66±5.66 <sup>ab</sup>   | 24.7±1.36 <sup>f</sup>     | 60.44±5.4 <sup>e</sup>     | 137.49±3.26 <sup>cd</sup>              | 132.29±7.28 <sup>d</sup>   |
|           | 9   | (Z)-4-Heptenal D | Dairy                                                    | 21.85±2.85 <sup>d</sup>                                      | 20.94±1.88 <sup>d</sup>     | 23.42±0.48 <sup>d</sup>     | 34.29±1.26 <sup>bcd</sup>  | 29.73±2.29 <sup>cd</sup>    | 24.42±0.7 <sup>d</sup>      | 117.68±19.2 <sup>a</sup>   | 47.57±10.23 <sup>bc</sup>  | 55.08±7.55 <sup>b</sup>                | 51.65±8.7 <sup>b</sup>     |
|           | 10  | (Z)-4-Heptenal M | Dairy                                                    | 12.96±1.53 <sup>d</sup>                                      | 17.79±1.43 <sup>cd</sup>    | 20.5±1.1b <sup>cd</sup>     | 21.37±0.39 <sup>bcd</sup>  | 23.61±1.15 <sup>bc</sup>    | 26.97±1.14 <sup>b</sup>     | 80.32±8.86 <sup>a</sup>    | 15.64±3.28 <sup>cd</sup>   | 20.43±3.01 <sup>bcd</sup>              | 23.28±3.01 <sup>bc</sup>   |
|           | 11  | 1-Hexanal D      | Apple, Fat, Fresh, Green, Oil                            | 1532.78±125.43 <sup>b</sup>                                  | 1911.11±45.8 <sup>a</sup>   | 1880.49±81.52 <sup>a</sup>  | 1849.91±32.17 <sup>a</sup> | 1994.87±89.5 <sup>a</sup>   | 1178.76±54.06 <sup>c</sup>  | 193.47±24.52 <sup>e</sup>  | 250.34±22.55 <sup>e</sup>  | 1056.63±110.37 <sup>c</sup>            | 841.97±108.79 <sup>d</sup> |
|           | 12  | 1-Hexanal M      | Apple, Fat, Fresh, Green, Oil                            | 520.69±49.55 <sup>ab</sup>                                   | 520.59±14.12 <sup>ab</sup>  | 561.97±9.49 <sup>a</sup>    | 485.65±1.95 <sup>b</sup>   | 479.79±10.89 <sup>b</sup>   | 474.39±13.72 <sup>b</sup>   | 135.6±26.82 <sup>e</sup>   | 202.29±10.73 <sup>d</sup>  | 380.49±7.35 <sup>c</sup>               | 377.15±26.45 <sup>c</sup>  |
|           | 13  | 1-Nonanal        | Fat, Floral, Green, Lemon                                | 32.21±2.38 <sup>cd</sup>                                     | 38.59±0.86 <sup>ab</sup>    | 30.55±0.71 <sup>cd</sup>    | 41.48±2.44 <sup>a</sup>    | 38.77±2.02 <sup>ab</sup>    | 34.19±0.41 <sup>bc</sup>    | 24.79±0.82 <sup>ef</sup>   | 19.88±1.17 <sup>f</sup>    | 28.14±1.12 <sup>de</sup>               | 21.63±1.56 <sup>f</sup>    |
|           | 14  | 3-Methyl butanal | Fruit, Cheese                                            | 26.83±3.56 <sup>g</sup>                                      | 113.82±47 <sup>c</sup>      | 103.46±1.96 <sup>cd</sup>   | 155.76±6.9 <sup>b</sup>    | 192.14±1.29 <sup>a</sup>    | 169.08±9.39 <sup>ab</sup>   | 40.47±4.36 <sup>ef</sup>   | 56.56±7.41 <sup>ef</sup>   | 71.94±0.9 <sup>de</sup>                | 99.1±7.48 <sup>cd</sup>    |
|           | 15  | Valeraldehyde    | loral, Pungent, Solvent                                  | 53.41±1.19 <sup>cd</sup>                                     | 62.95±2.57 <sup>a</sup>     | 61.01±0.62 <sup>ab</sup>    | 48.69±1.45 <sup>d</sup>    | 55.35±1.03 <sup>bcd</sup>   | 59.39±3.58 <sup>abc</sup>   | 38.81±2.46 <sup>e</sup>    | 36.95±2.78 <sup>e</sup>    | 37.86±2.99 <sup>e</sup>                | 40.59±4.44 <sup>e</sup>    |
|           | 16  | Benzaldehyde     | Bitter Almond, Burnt Sugar, Cherry, Malt, Roasted Pepper | 14.45±1.65 <sup>ab</sup>                                     | 10.99±0.25 <sup>cde</sup>   | 10.29±1.53 <sup>def</sup>   | 12.61±0.23 <sup>bcd</sup>  | 16.2±0.83 <sup>a</sup>      | 12.19±0.58 <sup>bcd</sup>   | 12.75±1.22 <sup>bcd</sup>  | 7.97±0.71 <sup>f</sup>     | 13.68±1.28 <sup>abc</sup>              | 8.35±0.53 <sup>ef</sup>    |
|           | 17  | Butanal D        | Banana, Green, Pungent                                   | 2.93±0.55 <sup>b</sup>                                       | 4.43±0.56 <sup>b</sup>      | 5.36±0.28 <sup>b</sup>      | 8.83±0.69 <sup>b</sup>     | 8.45±0.6 <sup>b</sup>       | 7.87±1.22 <sup>b</sup>      | 35.14±0.65 <sup>a</sup>    | 15.74±0.67 <sup>b</sup>    | 9.41±0.91 <sup>b</sup>                 | 34.86±6.28 <sup>a</sup>    |
|           | 18  | Butanal M        | Banana, Green, Pungent                                   | 22.42±5.81 <sup>a</sup>                                      | 21.3±2.93 <sup>ab</sup>     | 19.15±1.57 <sup>ab</sup>    | 17.15±0.8 <sup>ab</sup>    | 18.3±1.73 <sup>ab</sup>     | 20.93±0.63 <sup>ab</sup>    | 15.92±3.58 <sup>ab</sup>   | 16.05±2.32 <sup>ab</sup>   | 10.36±0.63 <sup>b</sup>                | 15.71±3.9 <sup>ab</sup>    |

|              |            |                       |                                          |                            |                            |                            |                            |                           |                             |                            |                           |                                 |                                |
|--------------|------------|-----------------------|------------------------------------------|----------------------------|----------------------------|----------------------------|----------------------------|---------------------------|-----------------------------|----------------------------|---------------------------|---------------------------------|--------------------------------|
|              | 19         | Diethyl acetal        | Creamy, Fruit, Pleasant, Tropical Fruit  | 142.5±17.62 <sup>b</sup>   | 124.64±13.76 <sup>b</sup>  | 138.61±10.25 <sup>b</sup>  | 111.27±15.95 <sup>b</sup>  | 139.77±16.71 <sup>b</sup> | 129.62±11.02 <sup>b</sup>   | 188.32±14.93 <sup>a</sup>  | 214.09±10.02 <sup>a</sup> | 121.8±4.28 <sup>b</sup>         | 140.67±4.96 <sup>b</sup>       |
|              | 20         | Heptanal D            | Citrus, Fat, Green, Nut                  | 21.81±0.46 <sup>cd</sup>   | 37.59±3.04 <sup>bcd</sup>  | 23.27±1 <sup>cd</sup>      | 39.5±2.24 <sup>bc</sup>    | 39.31±4.21 <sup>bc</sup>  | 20.89±2.55 <sup>cd</sup>    | 68.46±18.46 <sup>a</sup>   | 22.68±3.42 <sup>cd</sup>  | 49.92±7.02 <sup>ab</sup>        | 18.48±0.67 <sup>d</sup>        |
|              | 21         | Heptanal M            | Citrus, Fat, Green, Nut                  | 45.93±3.92 <sup>de</sup>   | 76.33±3.58 <sup>a</sup>    | 57.67±0.84 <sup>cd</sup>   | 59.38±1.78 <sup>bc</sup>   | 69.7±6 <sup>ab</sup>      | 53.17±5.06 <sup>cd</sup>    | 24.24±1.21 <sup>f</sup>    | 22.12±1.58 <sup>f</sup>   | 62.53±8.89 <sup>bc</sup>        | 39.67±3.37 <sup>e</sup>        |
|              | 22         | Valeraldehyde D       | Almond, Bitter, Malt, Oil, Pungent       | 135.32±21.28 <sup>bc</sup> | 88.07±14.04 <sup>de</sup>  | 154.99±21.56 <sup>b</sup>  | 159.78±8.71 <sup>b</sup>   | 101.35±6.09 <sup>d</sup>  | 56.91±5.43 <sup>e</sup>     | 202.09±8.84 <sup>a</sup>   | 66.8±4.64 <sup>e</sup>    | 115.91±6.06 <sup>cd</sup>       | 55.71±5.48 <sup>e</sup>        |
|              | 23         | Valeraldehyde M       | Almond, Bitter, Malt, Oil, Pungent       | 183.68±5.21 <sup>a</sup>   | 149.16±10.4 <sup>bc</sup>  | 182.25±4.52 <sup>a</sup>   | 161.02±4.23 <sup>b</sup>   | 141.39±3.92 <sup>c</sup>  | 103.33±4.52 <sup>d</sup>    | 23.54±1.48 <sup>f</sup>    | 87.36±1.96 <sup>e</sup>   | 94.52±4 <sup>de</sup>           | 83.75±3.67 <sup>e</sup>        |
|              | Subtotal   |                       |                                          | 10135.59                   | 12038.21                   | 11154.69                   | 9637.65                    | 11200.15                  | 9369.09                     | 3644.42                    | 3593.72                   | 6955.3                          | 6845.95                        |
|              | Percentage |                       |                                          | 62.93%                     | 66.49%                     | 69.41%                     | 62.05%                     | 64.90%                    | 61.42%                      | 16.77%                     | 26.21%                    | 37.96%                          | 41.89%                         |
| Alcohol<br>s | 1          | Isoamyl alcoholD      | Burnt, Cocoa, Floral, Malt               | 184.35±5.31 <sup>de</sup>  | 192.75±6.11 <sup>cd</sup>  | 165.23±4.93 <sup>def</sup> | 126.05±1.36 <sup>f</sup>   | 133.44±3.56 <sup>f</sup>  | 142.98±2.44 <sup>ef</sup>   | 281.58±9.91 <sup>b</sup>   | 228.15±3.33 <sup>c</sup>  | 343.2±7.73 <sup>a</sup>         | 207.26±6.94 <sup>c<br/>d</sup> |
|              | 2          | (Z)-2-Penten-1-ol     | ND                                       | 50.46±2.96 <sup>c</sup>    | 75.2±4.23 <sup>ab</sup>    | 55.39±2.2 <sup>c</sup>     | 60.7±1.25 <sup>bc</sup>    | 64.29±0.41 <sup>bc</sup>  | 72.78±2.81 <sup>b</sup>     | 62.35±0.85 <sup>bc</sup>   | 65.33±2.29 <sup>bc</sup>  | 90.28±13.65 <sup>a</sup>        | 89.94±1.88 <sup>a</sup>        |
|              | 3          | Isoamyl alcoholM      | Burnt, Cocoa, Floral, Malt               | 114.43±8.61 <sup>d</sup>   | 79.91±5.48 <sup>e</sup>    | 77.08±2.47 <sup>e</sup>    | 64.17±2.47 <sup>e</sup>    | 58.8±0.14 <sup>e</sup>    | 65.56±1.15 <sup>e</sup>     | 188.86±3.79 <sup>b</sup>   | 236.88±3.29 <sup>a</sup>  | 189.46±8.83 <sup>b</sup>        | 148.68±4.29 <sup>c</sup>       |
|              | 4          | 1-Hexanol D           | Banana, Flower, Grass, Herb              | 75.45±3.78 <sup>de</sup>   | 66.06±6.85 <sup>de</sup>   | 49.09±3.46 <sup>e</sup>    | 48.54±0.64 <sup>e</sup>    | 96.82±2.75 <sup>d</sup>   | 91.5±6.9 <sup>de</sup>      | 447.47±26.2 <sup>b</sup>   | 358.49±17.27 <sup>c</sup> | 431.6±9.11 <sup>b</sup>         | 498.76±22.36 <sup>a</sup>      |
|              | 5          | 1-Hexanol M           | Banana, Flower, Grass, Herb              | 333.43±7.55 <sup>de</sup>  | 308.05±9.6 <sup>ef</sup>   | 252±15.18 <sup>g</sup>     | 259.58±1.64 <sup>fg</sup>  | 379.85±12.94 <sup>d</sup> | 382.39±15.93 <sup>d</sup>   | 911.98±21.3 <sup>b</sup>   | 810.94±37.17 <sup>c</sup> | 902.87±3.51 <sup>b</sup>        | 997.55±21.79 <sup>a</sup>      |
|              | 6          | 1-Hydroxy-2-propanone | Butter, Herb, Malt, Pungent              | 23.17±3.11 <sup>c</sup>    | 15.98±0.74 <sup>d</sup>    | 16±0.87 <sup>d</sup>       | 17.98±0.42 <sup>cd</sup>   | 13.42±0.93 <sup>d</sup>   | 18.16±0.35 <sup>cd</sup>    | 54.76±4.54 <sup>a</sup>    | 40.82±2.67 <sup>b</sup>   | 23.49±2.67 <sup>c</sup>         | 23.51±2.46 <sup>c</sup>        |
|              | 7          | 1-Octen-3-ol          | Cucumber, Earth, Fat, Floral, Mushroom   | 49.28±3.21 <sup>cd</sup>   | 85.63±5.97 <sup>b</sup>    | 46.36±1.69 <sup>cde</sup>  | 77.47±4.25 <sup>b</sup>    | 103.94±3.66 <sup>a</sup>  | 77.58±4.56 <sup>b</sup>     | 42.04±3.87 <sup>de</sup>   | 35.93±1.91 <sup>e</sup>   | 54.76±1.96 <sup>c</sup>         | 46±3.71 <sup>cde</sup>         |
|              | 8          | 1-Pentanol            | Balsamic, Fruit, Green, Pungent, Yeast   | 116.83±6.49 <sup>e</sup>   | 111.16±4.12 <sup>e</sup>   | 128±6.58 <sup>e</sup>      | 211.74±4.04 <sup>c</sup>   | 162.76±1.58 <sup>d</sup>  | 132.04±3.58 <sup>e</sup>    | 277.36±7.24 <sup>b</sup>   | 395.48±11.46 <sup>a</sup> | 291.69±6.67 <sup>b</sup>        | 288.82±7.18 <sup>b</sup>       |
|              | 9          | 1-Penten-3-ol         | Butter, Fish, Green, Oxidized, Wet Earth | 61.23±4.55 <sup>f</sup>    | 176.68±3.5 <sup>ab</sup>   | 113.84±2.91 <sup>e</sup>   | 127.06±5.87 <sup>de</sup>  | 149.14±2.89 <sup>c</sup>  | 165.75±1.68 <sup>b</sup>    | 124.25±11.8 <sup>de</sup>  | 133.41±4.99 <sup>cd</sup> | 188.44±10.37 <sup>a</sup>       | 127.07±4.62 <sup>d<br/>e</sup> |
|              | 10         | 1-Propanol            | Alcohol, Candy, Pungent                  | 28.07±0.7 <sup>c</sup>     | 33.76±2.1 <sup>c</sup>     | 51.32±0.38 <sup>b</sup>    | 36.93±3.15 <sup>c</sup>    | 29.55±0.08 <sup>c</sup>   | 40.79±5.3 <sup>bc</sup>     | 28.23±1.74 <sup>c</sup>    | 89.73±0.86 <sup>a</sup>   | 86.53±3.2 <sup>a</sup>          | 77.28±6.5 <sup>a</sup>         |
|              | 11         | 3-Methyl-2-butanol    | Fruit                                    | 75.82±5.71 <sup>bc</sup>   | 115.71±6.59 <sup>a</sup>   | 57.81±0.87 <sup>d</sup>    | 81.31±1.52 <sup>b</sup>    | 118.5±3.81 <sup>a</sup>   | 52.3±4.24 <sup>de</sup>     | 44.26±2.99 <sup>e</sup>    | 22.87±3.55 <sup>f</sup>   | 40.15±3.51 <sup>e</sup>         | 64.43±4.81 <sup>cd</sup>       |
|              | 12         | 1-Butanol             | Fruit                                    | 54.51±3.68 <sup>ef</sup>   | 46.13±0.61 <sup>fg</sup>   | 50.58±0.42 <sup>efg</sup>  | 62.61±0.6 <sup>de</sup>    | 43.86±1.65 <sup>fg</sup>  | 90.9±1.18 <sup>b</sup>      | 36.74±6.62 <sup>g</sup>    | 119.27±5.89 <sup>a</sup>  | 76.65±3.83 <sup>cd</sup>        | 79.03±7.48 <sup>bc</sup>       |
|              | 13         | Ethanol D             | Alcohol, Brandy                          | 503.51±15.31 <sup>ab</sup> | 384.83±13.82 <sup>cd</sup> | 306.86±15.9 <sup>de</sup>  | 307.21±14.35 <sup>de</sup> | 290.7±32.93 <sup>e</sup>  | 358.88±11.34 <sup>cde</sup> | 433.33±45.05 <sup>bc</sup> | 540.43±17.44 <sup>a</sup> | 346.1±63.36 <sup>cd<br/>e</sup> | 403.04±54.58 <sup>c</sup>      |

|            |    |                  |                                              |                            |                            |                           |                            |                             |                           |                            |                           |                            |                            |
|------------|----|------------------|----------------------------------------------|----------------------------|----------------------------|---------------------------|----------------------------|-----------------------------|---------------------------|----------------------------|---------------------------|----------------------------|----------------------------|
|            | 14 | Ethanol M        | Alcohol, Brandy                              | 169.63±2.01 <sup>abc</sup> | 182.62±9.41 <sup>a</sup>   | 177.29±9.89 <sup>ab</sup> | 180.02±3.52 <sup>ab</sup>  | 152.66±12.98 <sup>abc</sup> | 174.48±3.76 <sup>ab</sup> | 140.63±11.66 <sup>c</sup>  | 180.2±10 <sup>ab</sup>    | 150.06±7.63 <sup>bc</sup>  | 178.26±10.65 <sup>ab</sup> |
|            | 15 | 2-Heptanol       | Citrus, Earth, Fried, Mushroom, Oil          | 64.35±7.5 <sup>de</sup>    | 49.23±3.33 <sup>de</sup>   | 34.75±2.74 <sup>e</sup>   | 32.74±2.29 <sup>e</sup>    | 49.98±8.06 <sup>de</sup>    | 36.03±2.72 <sup>e</sup>   | 137.26±12.58 <sup>c</sup>  | 96.51±14.47 <sup>cd</sup> | 369.29±61.73 <sup>a</sup>  | 205.81±15.78 <sup>b</sup>  |
|            | 16 | Isobutanol D     | Apple, Bitter, Cocoa, Wine                   | 37.97±0.67 <sup>cd</sup>   | 25.63±2 <sup>d</sup>       | 27.61±1.34 <sup>d</sup>   | 33.54±2.89 <sup>d</sup>    | 22.72±1.28 <sup>d</sup>     | 33.46±0.57 <sup>d</sup>   | 182.64±14.96 <sup>a</sup>  | 51.25±2.55 <sup>c</sup>   | 49.78±3.34 <sup>c</sup>    | 70.78±9.21 <sup>b</sup>    |
|            | 17 | Isobutanol M     | Apple, Bitter, Cocoa, Wine                   | 28.43±5.61 <sup>d</sup>    | 12.44±0.67 <sup>de</sup>   | 14.47±0.83 <sup>de</sup>  | 11.7±0.31 <sup>e</sup>     | 12.77±1.34 <sup>de</sup>    | 20.57±1.49 <sup>de</sup>  | 147.57±12.53 <sup>a</sup>  | 87.74±6.39 <sup>b</sup>   | 28.28±5.76 <sup>d</sup>    | 56.19±10.44 <sup>c</sup>   |
|            |    | Subtotal         |                                              | 1947.74                    | 1945.78                    | 1607.69                   | 1721.37                    | 1869.8                      | 1937.99                   | 3486.54                    | 3452.6                    | 3639.13                    | 3538.89                    |
| Percentage |    |                  |                                              | 12.09%                     | 10.75%                     | 10.00%                    | 11.08%                     | 10.84%                      | 12.71%                    | 16.04%                     | 25.18%                    | 19.86%                     | 21.66%                     |
| ketones    | 1  | 1-Penten-3-one D | Fish, Green, Mustard, Pungent                | 236.13±22.33 <sup>d</sup>  | 560.86±2.47 <sup>a</sup>   | 427.38±20.49 <sup>b</sup> | 387±16.28 <sup>b</sup>     | 428.85±5.01 <sup>b</sup>    | 311.72±13.78 <sup>c</sup> | 60.72±2.13 <sup>e</sup>    | 67.43±8.76 <sup>e</sup>   | 286.69±5.86 <sup>c</sup>   | 219.29±4.19 <sup>d</sup>   |
|            | 2  | 1-Penten-3-one M | Fish, Green, Mustard, Pungent                | 147.95±9.1 <sup>c</sup>    | 199.12±3.29 <sup>a</sup>   | 202.43±4.48 <sup>a</sup>  | 168.97±3.18 <sup>b</sup>   | 175.51±2.35 <sup>b</sup>    | 169.51±6.29 <sup>b</sup>  | 38.22±3.96 <sup>e</sup>    | 57.21±6.48 <sup>e</sup>   | 132.48±0.86 <sup>cd</sup>  | 117.74±8.34 <sup>d</sup>   |
|            | 3  | Acetoin D        | Butter, Creamy, Green Pepper                 | 42±6.96 <sup>de</sup>      | 33.32±2.83 <sup>e</sup>    | 28.75±1.44 <sup>e</sup>   | 31.54±0.61 <sup>e</sup>    | 29.68±0.79 <sup>e</sup>     | 30.12±2.79 <sup>e</sup>   | 387.3±9.27 <sup>b</sup>    | 733.31±21.3 <sup>a</sup>  | 110.98±6.01 <sup>d</sup>   | 204.06±6.11 <sup>c</sup>   |
|            | 4  | Acetoin M        | Butter, Creamy, Green Pepper                 | 147.63±3.38 <sup>d</sup>   | 68.72±3.53 <sup>e</sup>    | 77.7±2.7 <sup>e</sup>     | 72.03±0.45 <sup>e</sup>    | 63.37±0.75 <sup>e</sup>     | 67.74±2.16 <sup>e</sup>   | 428.76±5.81 <sup>b</sup>   | 632.68±11.27 <sup>a</sup> | 254.15±6.91 <sup>c</sup>   | 368.02±3.86 <sup>b</sup>   |
|            | 5  | 3-Octanone       | Butter, Herb, Mold                           | 23.08±1.92 <sup>de</sup>   | 17.8±1.21 <sup>e</sup>     | 19.19±1.19 <sup>e</sup>   | 54.5±2.65 <sup>a</sup>     | 23.65±1.84 <sup>de</sup>    | 20.43±1.41 <sup>de</sup>  | 39.36±7.5 <sup>bc</sup>    | 29.87±3.07 <sup>cd</sup>  | 49.34±6.73 <sup>ab</sup>   | 50.1±2.67 <sup>a</sup>     |
|            | 6  | Acetone          | Pungent                                      | 374.59±12.93 <sup>c</sup>  | 464.58±6.51 <sup>a</sup>   | 408.25±9.96 <sup>b</sup>  | 368.18±5.92 <sup>cd</sup>  | 412.38±15.88 <sup>b</sup>   | 340.82±3.29 <sup>d</sup>  | 197.73±14.25 <sup>ef</sup> | 229.32±8.35 <sup>e</sup>  | 181.46±12.01 <sup>f</sup>  | 212.68±23.45 <sup>ef</sup> |
|            | 7  | Pentan-2-one     | Fruit, Pungent                               | 286.9±23.01 <sup>e</sup>   | 518.62±66.54 <sup>bc</sup> | 236.12±30.79 <sup>e</sup> | 398.32±7.02 <sup>d</sup>   | 516.63±45 <sup>bc</sup>     | 766.05±29.47 <sup>a</sup> | 432.29±51.52 <sup>cd</sup> | 709.28±22.4 <sup>a</sup>  | 716.1±49.86 <sup>a</sup>   | 569.82±31.5 <sup>b</sup>   |
|            |    | Subtotal         |                                              | 1281.44                    | 1879.02                    | 1415.82                   | 1498.51                    | 1663.49                     | 1724.54                   | 1639.12                    | 2499.92                   | 1754.7                     | 1765.21                    |
| Percentage |    |                  |                                              | 7.96%                      | 10.38%                     | 8.81%                     | 9.65%                      | 9.64%                       | 11.31%                    | 7.54%                      | 18.23%                    | 9.58%                      | 10.80%                     |
| Acids      | 1  | Acetic acid D    | Acid, Fruit, Pungent, Sour, Vinegar          | 25.89±0.79 <sup>bc</sup>   | 30.74±2.18 <sup>a</sup>    | 23.23±0.71 <sup>cd</sup>  | 29.81±0.96 <sup>a</sup>    | 31.35±0.46 <sup>a</sup>     | 28.62±0.71 <sup>ab</sup>  | 21.09±1.82 <sup>d</sup>    | 23.76±1.1 <sup>cd</sup>   | 25.45±1.06 <sup>bc</sup>   | 24.04±1.29 <sup>cd</sup>   |
|            | 2  | Acetic acid M    | Acid, Fruit, Pungent, Sour, Vinegar          | 581.64±8.58 <sup>c</sup>   | 206.58±8.75 <sup>d</sup>   | 167.85±4.93 <sup>d</sup>  | 300.49±2.05 <sup>d</sup>   | 246.41±5.53 <sup>d</sup>    | 216.06±6.93 <sup>d</sup>  | 1503.48±73.47 <sup>a</sup> | 790.14±21.43 <sup>b</sup> | 1322.26±100.7 <sup>a</sup> | 811.06±102.91 <sup>b</sup> |
|            |    | Subtotal         |                                              | 607.53                     | 237.32                     | 191.08                    | 330.3                      | 277.76                      | 244.68                    | 1524.57                    | 813.89                    | 1347.71                    | 835.1                      |
|            |    | Percentage       |                                              | 3.25%                      | 1.16%                      | 1.06%                     | 1.81%                      | 1.41%                       | 1.39%                     | 6.05%                      | 4.68%                     | 6.21%                      | 4.25%                      |
| Esters     | 1  | Ethyl acetate    | Aromatic, Brandy, Grape                      | 254.1±2.06 <sup>abc</sup>  | 236±0.48 <sup>d</sup>      | 238.3±3.85 <sup>d</sup>   | 248.68±4.69 <sup>bcd</sup> | 243.33±3.87 <sup>cd</sup>   | 240.63±3.29 <sup>cd</sup> | 262.13±11.76 <sup>ab</sup> | 267.26±4.34 <sup>a</sup>  | 235.47±2.73 <sup>d</sup>   | 235.4±4.95 <sup>d</sup>    |
|            | 2  | Propyl acetate   | Celery, Floral, Pear, Red Fruit              | 5.53±0.63 <sup>b</sup>     | 6.68±0.77 <sup>b</sup>     | 6.8±0.47 <sup>b</sup>     | 8.24±0.69 <sup>b</sup>     | 7.85±0.39 <sup>b</sup>      | 8.19±0.62 <sup>b</sup>    | 222.56±9.24 <sup>a</sup>   | 14.56±0.57 <sup>b</sup>   | 32.53±8.08 <sup>b</sup>    | 15.24±0.56 <sup>b</sup>    |
|            | 3  | Methyl benzoate  | Herb, Lettuce, Prune, Violet                 | 6.82±0.13 <sup>c</sup>     | 8.86±0.45 <sup>c</sup>     | 6.91±0.37 <sup>c</sup>    | 8.77±0.84 <sup>c</sup>     | 12.42±1.16 <sup>a</sup>     | 9.21±1.24 <sup>bc</sup>   | 6.98±0.15 <sup>c</sup>     | 6.94±0.25 <sup>c</sup>    | 6.98±1.28 <sup>c</sup>     | 11.53±1.19 <sup>ab</sup>   |
|            | 4  | Ethyl butyrate D | Apple, Butter, Cheese, Pineapple, Strawberry | 74.25±1.89 <sup>b</sup>    | 51.32±9.35 <sup>c</sup>    | 22.58±1.72 <sup>de</sup>  | 55.27±1.76 <sup>c</sup>    | 105.41±10.45 <sup>a</sup>   | 30.87±5.37 <sup>d</sup>   | 103.83±13.03 <sup>a</sup>  | 16.32±2.78 <sup>de</sup>  | 12.08±0.65 <sup>c</sup>    | 53.44±5.94                 |
|            | 5  | Ethyl butyrate M | Apple, Butter, Cheese, Pineapple, Strawberry | 73.15±8.03 <sup>ab</sup>   | 76.17±7.47 <sup>ab</sup>   | 44.57±1.63 <sup>bcd</sup> | 78.37±0.86 <sup>ab</sup>   | 99.54±3.21 <sup>a</sup>     | 55.66±4.19 <sup>bcd</sup> | 27.68±3.37 <sup>d</sup>    | 31.21±5.88 <sup>cd</sup>  | 64.57±6.36 <sup>abc</sup>  | 59.76±8.26 <sup>bcd</sup>  |

|    |                     |                                      |                            |                           |                            |                           |                             |                           |                             |                             |                             |                                       |
|----|---------------------|--------------------------------------|----------------------------|---------------------------|----------------------------|---------------------------|-----------------------------|---------------------------|-----------------------------|-----------------------------|-----------------------------|---------------------------------------|
| 6  | Butyl isovalerate D | Fruity                               | 126.38±7.72 <sup>c</sup>   | 129.57±3.89 <sup>c</sup>  | 118.96±0.41 <sup>c</sup>   | 131.65±7.17 <sup>c</sup>  | 114.63±5.33 <sup>c</sup>    | 108.01±4.17 <sup>c</sup>  | 2179.86±130.74 <sup>a</sup> | 466.64±87.95 <sup>c</sup>   | 1158.67±111.06 <sup>b</sup> | 365.65±37.51 <sup>c</sup>             |
| 7  | Butyl isovalerate M | Fruity                               | 87.38±4.57 <sup>d</sup>    | 98.44±3.75 <sup>cd</sup>  | 67.57±3.11 <sup>d</sup>    | 80.02±4.4 <sup>d</sup>    | 86.82±8.29 <sup>d</sup>     | 68.37±6.81 <sup>d</sup>   | 512.06±44.49 <sup>a</sup>   | 187.77±9.19 <sup>bc</sup>   | 493.79±46.23 <sup>a</sup>   | 250.74±48 <sup>b</sup>                |
| 8  | Butyl acetate D     | Apple, Banana                        | 55.85±2.7 <sup>e</sup>     | 258.3±40.44 <sup>bc</sup> | 148.52±1.78 <sup>cde</sup> | 59.04±1.78 <sup>e</sup>   | 202.97±15.59 <sup>bcd</sup> | 273.57±36.74 <sup>b</sup> | 550.77±122.76 <sup>a</sup>  | 162.26±27.97 <sup>bcd</sup> | 131.86±13.06 <sup>de</sup>  | 82.66±8.26 <sup>de</sup>              |
| 9  | Butyl acetate M     | Apple, Banana                        | 105.3±1.45 <sup>f</sup>    | 172.51±6.05 <sup>de</sup> | 168.06±1.52 <sup>de</sup>  | 107.44±2.27 <sup>f</sup>  | 173.53±2.03 <sup>d</sup>    | 195.9±4.26 <sup>c</sup>   | 422.17±3.81 <sup>a</sup>    | 237.94±8.83 <sup>b</sup>    | 154.99±1.51 <sup>e</sup>    | 158.75±4.49 <sup>d</sup> <sub>e</sub> |
| 10 | Ethyl formate D     | Pungent                              | 4.86±1.63 <sup>c</sup>     | 12.45±1.1abc              | 12.79±0.35 <sup>abc</sup>  | 17.67±0.58 <sup>ab</sup>  | 20.53±0.85 <sup>ab</sup>    | 17.2±2.23 <sup>ab</sup>   | 16.8±1.16 <sup>ab</sup>     | 10.33±4.06 <sup>bc</sup>    | 22.27±1.38 <sup>a</sup>     | 18.66±8.3 <sup>ab</sup>               |
| 11 | Ethyl formate M     | Pungent                              | 58.49±0.85 <sup>b</sup>    | 55.85±4.33 <sup>b</sup>   | 57.77±0.55 <sup>b</sup>    | 71.28±2.72 <sup>a</sup>   | 53.42±3.51 <sup>b</sup>     | 69.55±4.1 <sup>a</sup>    | 40.12±1.4 <sup>c</sup>      | 38.45±1.94 <sup>c</sup>     | 53.16±1.79 <sup>b</sup>     | 51.54±4.31 <sup>b</sup>               |
| 12 | Geranyl formate     | Floral                               | 25±1.72 <sup>de</sup>      | 28.09±0.43 <sup>bc</sup>  | 20.24±0.8 <sup>ef</sup>    | 32.07±2.91 <sup>ab</sup>  | 36.47±3.02 <sup>a</sup>     | 26.92±2.68 <sup>bcd</sup> | 20.95±2.97 <sup>def</sup>   | 17.9±1.97 <sup>f</sup>      | 33.18±2.52 <sup>ab</sup>    | 19.83±1.86 <sup>ef</sup>              |
| 13 | Hexyl acetate       | Apple, Banana, Grass, Herb, Pear     | 28.16±5.25 <sup>cde</sup>  | 19.85±1.25 <sup>e</sup>   | 21.08±0.84 <sup>e</sup>    | 21.33±2.01 <sup>e</sup>   | 20.06±0.72 <sup>de</sup>    | 22.03±1.51 <sup>e</sup>   | 81.01±6.91 <sup>a</sup>     | 30.66±3.68 <sup>bcd</sup>   | 38.48±1.94 <sup>b</sup>     | 31.14±2.29 <sup>bc</sup>              |
| 14 | Hexyl propanoate    | Apple, Banana, Grass, Herb, Pear     | 62.36±14.35 <sup>b</sup>   | 25.92±2.23 <sup>cd</sup>  | 19.66±1.44 <sup>cd</sup>   | 18.9±0.47 <sup>d</sup>    | 17.8±0.5 <sup>d</sup>       | 16.37±1.27 <sup>d</sup>   | 27.78±3.82 <sup>cd</sup>    | 45.94±2.04 <sup>bc</sup>    | 54.61±8.95 <sup>b</sup>     | 117.14±13.96 <sub>a</sub>             |
| 15 | Isopentyl acetate D | Apple, Banana, Glue, Pear            | 75.79±9.52 <sup>b</sup>    | 56.92±0.67 <sup>b</sup>   | 57.64±1.23 <sup>b</sup>    | 59.95±3.22 <sup>b</sup>   | 67.33±2.57 <sup>b</sup>     | 56.46±2.06 <sup>b</sup>   | 2501.48±138.88 <sup>a</sup> | 255.38±97.67 <sup>b</sup>   | 260.85±56.92 <sup>b</sup>   | 106.78±24.54 <sub>b</sub>             |
| 16 | Isopentyl acetate M | Apple, Banana, Glue, Pear            | 66.84±1.77 <sup>e</sup>    | 71.76±0.7 <sup>e</sup>    | 64.26±2.1 <sup>e</sup>     | 67±3.16 <sup>e</sup>      | 66.92±1.86 <sup>e</sup>     | 63.82±3.31 <sup>e</sup>   | 506.74±25.93 <sup>a</sup>   | 303.25±57.17 <sup>b</sup>   | 223.16±12.51 <sup>c</sup>   | 148.92±15.48 <sub>d</sub>             |
| 17 | Isobutyl acetate    | Apple, Banana, Floral, Herb          | 35.36±5.47 <sup>b</sup>    | 40.73±1.54 <sup>b</sup>   | 42.12±2.63 <sup>b</sup>    | 41.02±2.73 <sup>b</sup>   | 40.94±0.5 <sup>b</sup>      | 30.49±2.13 <sup>b</sup>   | 2074.07±151.52 <sup>a</sup> | 164.56±5.61 <sup>b</sup>    | 32.46±1.82 <sup>b</sup>     | 175.04±14.69 <sub>b</sub>             |
| 18 | Methyl isobutyrate  | Flower, Fruit                        | 135.22±17.73 <sup>bc</sup> | 179.78±10.09 <sup>a</sup> | 122.84±5.23 <sup>c</sup>   | 130.35±5.09 <sup>bc</sup> | 151.77±8.43 <sup>b</sup>    | 128.76±5.87 <sup>bc</sup> | 84.96±3.52 <sup>d</sup>     | 65.69±3.58 <sup>d</sup>     | 189.39±3.03 <sup>a</sup>    | 130.64±12.26 <sub>bc</sub>            |
| 19 | Methyl acetate      | Ester, Green                         | 82.35±9.64 <sup>d</sup>    | 53.39±3.19 <sup>d</sup>   | 49.93±1.03 <sup>d</sup>    | 57.41±1.48 <sup>d</sup>   | 65.46±3.71 <sup>d</sup>     | 49.64±1.6 <sup>d</sup>    | 408.04±49.53 <sup>b</sup>   | 237.51±32.16 <sup>c</sup>   | 565.05±60.86 <sup>a</sup>   | 332.55±60.64 <sub>b</sub>             |
| 20 | Methyl butanoate    | Apple, Banana, Cheese, Ester, Floral | 28.21±3.2 <sup>e</sup>     | 37.24±2.94 <sup>cd</sup>  | 32.58±1 <sup>de</sup>      | 63.66±0.9 <sup>a</sup>    | 43.73±1.16 <sup>bc</sup>    | 62.94±0.6 <sup>a</sup>    | 11.29±1.81 <sup>f</sup>     | 49.1±4.46 <sup>b</sup>      | 68.03±3.3 <sup>a</sup>      | 62.56±3.11 <sup>a</sup>               |
| 21 | Pentyl acetate D    | Apple, Banana, Glue, Pear            | 28.65±0.74 <sup>c</sup>    | 30.41±3.43 <sup>c</sup>   | 29.97±2.04 <sup>c</sup>    | 40.41±8.35 <sup>c</sup>   | 32.26±3.45 <sup>c</sup>     | 31.93±3.45 <sup>c</sup>   | 550.87±39.83 <sup>a</sup>   | 150.2±14.43 <sup>bc</sup>   | 258.69±15.65 <sup>b</sup>   | 78.4±4.81 <sup>c</sup>                |
| 22 | Pentyl acetate M    | Apple, Banana, Glue, Pear            | 29.84±1.07 <sup>d</sup>    | 31.12±0.8 <sup>d</sup>    | 28.25±0.34 <sup>d</sup>    | 36.87±2.18 <sup>d</sup>   | 30.96±2.77 <sup>d</sup>     | 27.59±0.18 <sup>d</sup>   | 333.02±11.98 <sup>a</sup>   | 212.79±16.67 <sup>b</sup>   | 235.57±17.64 <sup>b</sup>   | 115.8±14.97 <sup>c</sup>              |
| 23 | Ethyl propionate    | Apple, Pineapple, Rum, Strawberry    | 2.26±0.12 <sup>b</sup>     | 2.46±0.2 <sup>b</sup>     | 2.97±0.06 <sup>b</sup>     | 2.67±0.06 <sup>b</sup>    | 2.38±0.08 <sup>b</sup>      | 2.67±0.41 <sup>b</sup>    | 5.5±1.18 <sup>b</sup>       | 3.25±0.61 <sup>b</sup>      | 16.86±3.36 <sup>a</sup>     | 4.14±0.78 <sup>b</sup>                |
| 24 | Propyl propionate   | Apple, Banana, Pineapple             | 12.49±3.16 <sup>b</sup>    | 12.55±1.16 <sup>b</sup>   | 11.48±1.2 <sup>b</sup>     | 12.7±1.33 <sup>b</sup>    | 19.95±2.73 <sup>b</sup>     | 7.85±0.84 <sup>b</sup>    | 194.33±17.11 <sup>a</sup>   | 10.8±3.75 <sup>b</sup>      | 6.12±0.36 <sup>b</sup>      | 15.19±2.21 <sup>b</sup>               |
|    | Subtotal            |                                      | 1464.64                    | 1696.37                   | 1395.84                    | 1450.78                   | 1716.49                     | 1604.62                   | 11145                       | 2986.71                     | 4348.81                     | 2641.47                               |
|    | Percentage          |                                      | 9.09%                      | 9.37%                     | 8.69%                      | 9.34%                     | 9.95%                       | 10.52%                    | 51.28%                      | 21.78%                      | 23.74%                      | 16.16%                                |

|           |   |                         |                                          |                            |                          |                           |                           |                           |                           |                           |                          |                          |                           |
|-----------|---|-------------------------|------------------------------------------|----------------------------|--------------------------|---------------------------|---------------------------|---------------------------|---------------------------|---------------------------|--------------------------|--------------------------|---------------------------|
| Terpenes  | 1 | Terpinolene             | Pine                                     | 251.65±24.54 <sup>a</sup>  | 35.43±5 <sup>de</sup>    | 18.73±1.16 <sup>e</sup>   | 205.38±17.94 <sup>b</sup> | 106.19±18.4 <sup>c</sup>  | 29.9±4.45 <sup>e</sup>    | 48±9.39 <sup>de</sup>     | 76.86±9.01 <sup>cd</sup> | 28.25±2.46 <sup>e</sup>  | 200.48±30.56 <sup>b</sup> |
|           | 2 | α-Phellandrene          | Citrus, Fresh, Mint, Pepper, Spice, Wood | 59.95±2.94 <sup>de</sup>   | 26.97±0.78 <sup>e</sup>  | 32.85±1.29 <sup>de</sup>  | 261.67±13.79 <sup>a</sup> | 140.65±7.47 <sup>c</sup>  | 32.92±1.18 <sup>de</sup>  | 70.3±11.63 <sup>d</sup>   | 29.73±3.06 <sup>e</sup>  | 46.23±3.29 <sup>de</sup> | 196.78±4.68 <sup>b</sup>  |
|           | 3 | α-Pinene                | Cedarwood, Pine, Sharp                   | 21.01±6.65 <sup>ab</sup>   | 4.44±0.38 <sup>c</sup>   | 4.55±0.19 <sup>c</sup>    | 25.2±4.03 <sup>a</sup>    | 12.18±2.65 <sup>bc</sup>  | 8.37±1.62 <sup>c</sup>    | 4.79±0.72 <sup>c</sup>    | 11.22±0.91 <sup>bc</sup> | 9.3±0.66 <sup>c</sup>    | 20.93±7.42 <sup>ab</sup>  |
|           | 4 | Myrcene                 | Balsamic, Fruit, Geranium, Herb, Must    | 31.67±2.21 <sup>c</sup>    | 19.66±0.69 <sup>c</sup>  | 18.76±1.12 <sup>c</sup>   | 136.27±14.1 <sup>a</sup>  | 19.37±2.31 <sup>c</sup>   | 67.8±4.76 <sup>b</sup>    | 23.58±0.7 <sup>c</sup>    | 26.99±2.24 <sup>c</sup>  | 23.44±4.13 <sup>c</sup>  | 30.59±6.51 <sup>c</sup>   |
|           | 5 | β-Pinene                | Pine, Polish, Wood                       | 111.86±13.576 <sup>a</sup> | 25.4±0.98 <sup>d</sup>   | 21.75±1.77 <sup>d</sup>   | 83.24±10.67 <sup>b</sup>  | 44.61±5.71 <sup>c</sup>   | 31.14±3.35 <sup>cd</sup>  | 28.5±1.71 <sup>cd</sup>   | 30.79±2.21 <sup>cd</sup> | 24.46±1.4 <sup>d</sup>   | 95.24±3.59 <sup>ab</sup>  |
|           |   | Subtotal                |                                          | 476.13                     | 111.89                   | 96.64                     | 711.76                    | 323.01                    | 170.13                    | 175.17                    | 175.6                    | 131.68                   | 544.02                    |
|           |   | Percentage              |                                          | 2.96%                      | 0.62%                    | 0.60%                     | 4.58%                     | 1.87%                     | 1.12%                     | 0.81%                     | 1.28%                    | 0.72%                    | 3.33%                     |
| Pyrazines | 1 | 2,3,5-Trimethylpyrazine | Cocoa, Earth, Must, Potato, Roast        | 43.37±1.73 <sup>a</sup>    | 16.23±0.97 <sup>bc</sup> | 13.44±0.46 <sup>bcd</sup> | 14.01±0.59 <sup>bcd</sup> | 15.11±1.59 <sup>bcd</sup> | 10.28±0.27 <sup>bcd</sup> | 7.15±0.53 <sup>cd</sup>   | 6.39±0.39 <sup>d</sup>   | 9.58±0.9 <sup>bcd</sup>  | 18.61±2.48 <sup>b</sup>   |
|           |   | Subtotal                |                                          | 43.37                      | 16.23                    | 13.44                     | 14.01                     | 15.11                     | 10.28                     | 7.15                      | 6.39                     | 9.58                     | 18.61                     |
|           |   | Percentage              |                                          | 0.27%                      | 0.09%                    | 0.08%                     | 0.09%                     | 0.09%                     | 0.07%                     | 0.03%                     | 0.05%                    | 0.05%                    | 0.11%                     |
| Furans    | 1 | 2,5-Dimethylfuran       | Savory                                   | 108.12±8.18 <sup>bc</sup>  | 137.33±7.22 <sup>a</sup> | 139.87±8.02 <sup>a</sup>  | 113.21±5.6 <sup>b</sup>   | 144.21±10.78 <sup>a</sup> | 137.19±3.61 <sup>a</sup>  | 105.06±5.24 <sup>bc</sup> | 134.29±5.61 <sup>a</sup> | 93.85±5.92 <sup>c</sup>  | 108.13±1.14 <sup>bc</sup> |
|           |   | Subtotal                |                                          | 108.12                     | 137.33                   | 139.87                    | 113.21                    | 144.21                    | 137.19                    | 105.06                    | 134.29                   | 93.85                    | 108.13                    |
|           |   | Percentage              |                                          | 0.67%                      | 0.76%                    | 0.87%                     | 0.73%                     | 0.84%                     | 0.90%                     | 0.48%                     | 0.98%                    | 0.51%                    | 0.66%                     |
| Benzenes  | 1 | Toluene                 | ND                                       | 41.73±4.18 <sup>c</sup>    | 44.4±1.68 <sup>bc</sup>  | 54.99±1.6 <sup>a</sup>    | 54.05±5.22 <sup>a</sup>   | 46.35±1.39 <sup>bc</sup>  | 54.96±0.94 <sup>a</sup>   | 6.55±0.36 <sup>d</sup>    | 50.24±2.55 <sup>ab</sup> | 41.29±1.25 <sup>c</sup>  | 43.39±1.44 <sup>c</sup>   |
|           |   | Subtotal                |                                          | 41.73                      | 44.4                     | 54.99                     | 54.05                     | 46.35                     | 54.96                     | 6.55                      | 50.24                    | 41.29                    | 43.39                     |
|           |   | Percentage              |                                          | 0.26%                      | 0.25%                    | 0.34%                     | 0.35%                     | 0.27%                     | 0.36%                     | 0.03%                     | 0.37%                    | 0.23%                    | 0.27%                     |
| Total     |   |                         |                                          | 16106.28                   | 18106.55                 | 16070.06                  | 15531.64                  | 17256.37                  | 15253.48                  | 21733.59                  | 13713.35                 | 18322.04                 | 16340.77                  |

Means with different letters in the same column indicate significant differences (Duncan’s test,  $p < 0.05$ ). Note: a From Flavornet database (<https://www.femaflavor.org>; <https://foodb.ca/compounds>; <http://www.flavornet.org>; accessed August 15, 2023). ND: Not reported in relevant literature.



**Table S3.** Sample information of *A. arguta*.

| No. | Variety         | Selection time and place                                                                           | Selection methods       | Harvest time       |
|-----|-----------------|----------------------------------------------------------------------------------------------------|-------------------------|--------------------|
| 1   | ‘Kuily’         | Selected from wild resources in 1980 from Fuxing Forestry, Ji'an County, Jilin Province.           | asexual reproduction    | September 6, 2022  |
| 2   | ‘Fenglv’        | Selected from the wild resources of Fuxing Forest Farm, Ji'an County, Jilin Province, 1980.        | asexual reproduction    | September 6, 2022  |
| 3   | ‘Jialv’         | Selected from wild resources in Huanren, Liaoning, 1984.                                           | asexual reproduction    | September 6, 2022  |
| 4   | ‘Wanlv’         | Selected from the wild resources of Zuojia Township, Jilin City, 1997.                             | asexual reproduction    | September 13, 2022 |
| 5   | ‘Xinlv’         | Selected in 1968 from wild resources in Zuojia Township, Jilin City.                               | asexual reproduction    | September 6, 2022  |
| 6   | ‘Pinglv’        | Selected from wild resources of Yulin Commune, Ji'an County, Jilin Province, 1981.                 | asexual reproduction    | September 6, 2022  |
| 7   | ‘Lvbaoy’        | A good single wild plant was found in 1981 in the cold onion ditch of Dunhua, Jilin.               | asexual reproduction    | September 6, 2022  |
| 8   | ‘Cuiyu’         | Wild resources collected in 1980 from Waifanggou, Liangshui Commune, Ji'an County, Jilin Province. | asexual reproduction    | September 6, 2022  |
| 9   | ‘Tianxinbaoy’   | Selected from 24 mixed live progeny of germplasm resources in Zuojia Township, Jilin City, China.  | vegetative reproduction | September 6, 2022  |
| 10  | ‘Longcheng No2’ | Selected from wild resources in Kandian County, Denning, 2002.                                     | asexual reproduction    | September 13, 2022 |

**Table S4.** Overview of the sampling sits.

| The sampling sit                                                                                                                                              | Longitude     | Latitude         | Average temperature (°C) | Average precipitation (mm) | Average air pressure (hPa) | Active cumulative temperature (°C) | Average relative humidity (%) | Average wind speed (m/s) |
|---------------------------------------------------------------------------------------------------------------------------------------------------------------|---------------|------------------|--------------------------|----------------------------|----------------------------|------------------------------------|-------------------------------|--------------------------|
| <i>Actinidia arguta</i> Resource Nursery of the Institute of Special Animal and Plant Sciences of the Chinese Academy of Agricultural Sciences in Zuojia Town | 44°00'-44°07' | 126°01'-126°-08' | 5.6                      | 679                        | 991.6                      | 2779.8                             | 67                            | 2.6                      |

**Table S5.** Organic acid standard curves.

| Name          | Standard Curves  | R <sup>2</sup> |
|---------------|------------------|----------------|
| Oxalic Acid   | Y=15184x+28.758  | 0.9994         |
| Malic Acid    | Y=917.66x+19.027 | 0.9995         |
| Shikimic Acid | Y=65935x+474.72  | 0.9995         |
| Lactic Acid   | Y=683.52x-60.731 | 0.9997         |
| Citric Acid   | Y=1487x-4.2267   | 0.9998         |
| Quinic Acid   | Y=611.85x-0.598  | 0.9998         |

**Table S6.** Analysis conditions.

|                                 |                                    |
|---------------------------------|------------------------------------|
| Gas-ion transport spectral unit | Automatic headspace injection unit |
|---------------------------------|------------------------------------|

|                         |                                                 |                              |             |
|-------------------------|-------------------------------------------------|------------------------------|-------------|
| Analysis time           | 30 min                                          | Inlet volume                 | 100 $\mu$ L |
| Column type             | MXT-WAX (30 m $\times$ 0.53 $\times$ 1 $\mu$ m) | Incubation time              | 10 min      |
| Column temperature      | 60°C                                            | Incubation temperature       | 60°C        |
| Carrier Gas / Drift Gas | N <sub>2</sub> (99.999% pure)                   | Injection needle temperature | 85°C        |
| IMS temperature         | 45°C                                            | Incubation speed             | 500 rpm     |

**Table S7.** Gas chromatography conditions.

| Time      | E1 (Drift Gas) | E2 (Carrier Gas) | Recording |
|-----------|----------------|------------------|-----------|
| 00:00,000 |                | 2 mL/min         | rec       |
| 02:00,000 |                | 2 mL/min         | -         |
| 10:00,000 | 150 mL/min     | 10 mL/min        | -         |
| 20:00,000 |                | 100 mL/min       | -         |
| 30:00,000 |                | 100 mL/min       | Stop      |
